# Supplementary material for: MycN Is Critical for the Maintenance of Human Embryonic Stem Cell-Derived Neural Crest Stem Cells
Source: PubMed Central journal article supplement (PMC4729679; doi:10.1371/journal.pone.0148062), 2016-01-27

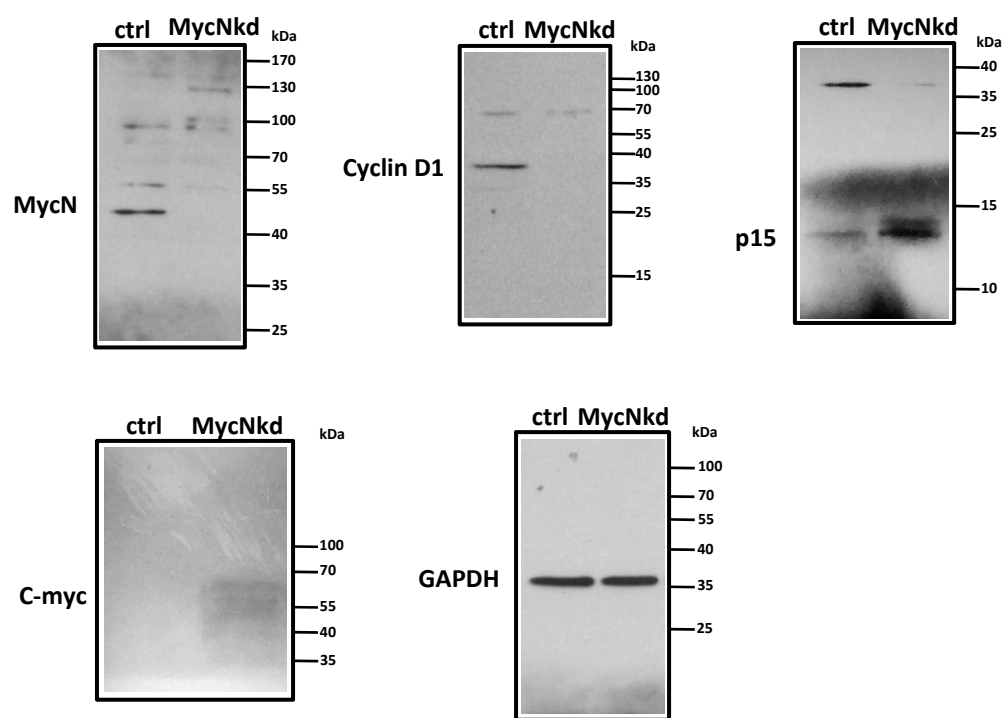

Supplement: pone.0148062.s005.pdf [file pone.0148062.s005.pdf]
