# Supplementary material for: MycN Is Critical for the Maintenance of Human Embryonic Stem Cell-Derived Neural Crest Stem Cells
Source: PubMed Central journal article supplement (PMC4729679; doi:10.1371/journal.pone.0148062), 2016-01-27
Supplement: pone.0148062.s006.pdf [file pone.0148062.s006.pdf]

*SI Table Primer information of RT-PCR*

| Gene                                 |         | PRIMER SEQUENCE (5'-3')   | Tm °C |
|--------------------------------------|---------|---------------------------|-------|
| <b>HNK-1</b>                         | forward | CTGGAGTCTGAGAAGGGGTC      | 60    |
|                                      | reverse | CGGAGACGCTCCGGACT         |       |
| <b>NTRK1</b>                         | forward | TCAACAAAATGTGGACGGAGA     | 60    |
|                                      | reverse | GTGGTGAACACAGGCATCAC      |       |
| <b>TH</b>                            | forward | CACGAAGTACTCCAGGTGGG      | 60    |
|                                      | reverse | CGAGCTGTGAAGGTGTTTGA      |       |
| <b>MYCN</b><br>3 transcript variants | forward | CTTCGGTCCAGTTTCTCAC       | 60    |
|                                      | reverse | GTCCGAGCGTGTCAATTTT       |       |
| <b>MYCN</b><br>2 transcript variants | forward | CACAGTGACCACGTCGATT       | 60    |
|                                      | reverse | CACAAGGCCCTCAGTACCTC      |       |
| <b>SOX10</b>                         | forward | CTTTCTGTGCTGCATACGG       | 60    |
|                                      | reverse | AGCTCAGCAAGACGCTGG        |       |
| <b>SNAIL</b>                         | forward | TTTACCTCCAGCAGCCCTA       | 60    |
|                                      | reverse | CCCACTGTCTCATCTGACA       |       |
| <b>C-MYC</b>                         | forward | GCGTCTGGGAAGGGAGATCCGGAGC | 60    |
|                                      | reverse | TTGAGGGGCATCGTCGGGAGGCTG  |       |
| <b>PHOX2α</b>                        | forward | CTTCCAATACAGCCCCTG        | 58    |
|                                      | reverse | ATGGCTCTGGGAAGAACTTG      |       |
| <b>PHOX2β</b>                        | forward | CTTCGGGAGACTCACTACC       | 60    |
|                                      | reverse | GTCGTCCCTGGAAGAGTCAG      |       |
| <b>CCND1</b>                         | forward | TCCTCTCCAAAATGCCAGAG      | 60    |
|                                      | reverse | GGCGGATTGAAATGAACTT       |       |
| <b>BMI1</b>                          | forward | TTCATTGATGCCACAACCAT      | 60    |
|                                      | reverse | CATTTTTGAAAAGCCCTGGA      |       |
| <b>HAND2</b>                         | forward | CAGCAACGACAAGAAAACCA      | 60    |
|                                      | reverse | GGATGATTCCAATGCAAGG       |       |
| <b>GATA3</b>                         | forward | CTCATTAAAGCCCAAGCGAAG     | 60    |
|                                      | reverse | TTTTTCGGTTTCTGGTCTGG      |       |
| <b>EZH2</b>                          | forward | TTGTCAATGTAGTTCAGAG       | 60    |
|                                      | reverse | GTAGCACGGGCACTGCTTG       |       |
| <b>MASH1</b>                         | forward | CGGCCAACAGAAGATGAGT       | 60    |
|                                      | reverse | CCGACGAGTAGGATGAGACC      |       |
| <b>Peripherin</b>                    | forward | AAGACGACTGTGCCTGAGGT      | 60    |
|                                      | reverse | ATGCAGAGGGAGAGGAGACA      |       |
| <b>NGFR</b>                          | forward | ACCTCATCCCTGTCTATTGCTCC   | 60    |
|                                      | reverse | GCTGTTGGCTCCTGCTTGT       |       |
| <b>CDKN2α</b>                        | forward | CTTCCTGGACACGCTGGT        | 60    |
|                                      | reverse | CATGGTTACTGCCTCTGGTG      |       |
| <b>CDKN2β</b>                        | forward | GGGGACTAGTGGAGAAGGTG      | 60    |
|                                      | reverse | GGTGAGAGTGGCAGGGTC        |       |
| <b>P21</b>                           | forward | CGACTGTGATGCGCTAATGG      | 60    |
|                                      | reverse | CTGCCTCTCCCAACTCATC       |       |
| <b>Tuj1</b>                          | forward | CCAGCTGCAAGTCCGAGT        | 58    |
|                                      | reverse | CGCCAGTATGAGGGAGAT        |       |
| <b>MAP2</b>                          | forward | GCCTTGTTATTCTCCTGCAA      | 60    |
|                                      | reverse | GAGGAAGCATTGATTGGGAG      |       |
| <b>α-SMA</b>                         | forward | AGGAAGGACCTCTATGCTAACAT   | 58    |
|                                      | reverse | AACACATAGGTAACGAGTCAGAGC  |       |
| <b>GAPDH</b>                         | forward | AGGGTCATCATCTCTGCC        | 60    |
|                                      | reverse | CCATCACGCCACAGTTTC        |       |
